# Supplementary material
Source: HighWire-hosted journal article supplement (https://www.cmajopen.ca/highwire/filestream/89596/field_highwire_adjunct_files/3/open-2022-0070-original-submission.pdf)
Supplement: open-2022-0070-original-submission.pdf [file open-2022-0070-original-submission.pdf]

1  
2  
3 **Location of Death Among Children with Life-Threatening Conditions: A National**  
4  
5 **Population-Based Observational Study**  
6  
7

8 Kimberley Widger PhD, Lawrence S. Bloomberg Faculty of Nursing, University of Toronto;  
9 Hospital for Sick Children, Toronto (kim.widger@utoronto.ca)  
10

11 Sarah Brennenstuhl PhD, Lawrence S. Bloomberg Faculty of Nursing, University of Toronto  
12

13 Peter Tanuseputro MD, Department of Medicine, Ottawa Hospital Research Institute, University  
14 of Ottawa; Bruyère Research Institute, Ottawa.  
15

16 Katherine E. Nelson MD PhD, Hospital for Sick Children, Toronto  
17

18 Adam Rapoport MD, Hospital for Sick Children, Toronto; Emily's House Children's Hospice,  
19 Toronto  
20

21 Hsien Seow PhD, McMaster University, Hamilton  
22

23 Harold Siden MD, MHSc, BC Children's Hospital, Vancouver; Canuck Place Children's  
24 Hospice, Vancouver  
25

26 Chris Vadeboncoeur MD, Children's Hospital of Eastern Ontario; Roger Neilson House, Ottawa  
27

28 Sumit Gupta MD PhD, Hospital for Sick Children, Toronto  
29  
30

31 **Funding Statement:** This study was funded by the Canadian Institutes of Health Research  
32 (CIHR) – Institute of Human Development and Child and Youth Health through an Operating  
33 Grant: Analyses of Existing Cohorts & Databases (#383565). KW is supported by a Tier 2  
34 Canada Research Chair in Pediatric Palliative Care. PT is supported by a PSI Graham  
35 Farquharson Knowledge Translation Fellowship  
36  
37  
38

39 **Competing Interests:** The authors do not have any financial or other competing interests to  
40 declare.  
41  
42  
43  
44  
45  
46  
47  
48  
49  
50  
51  
52  
53  
54  
55  
56  
57  
58  
59  
60

## ABSTRACT

**Background** Examining patterns in location of death among children with life-threatening conditions (e.g., cancer, genetic disorders, neurological conditions) may reveal important inequities in access to hospital and community support services. We aimed to identify demographic, socioeconomic, and geographic factors associated with variations in location of death for children across Canada with life-threatening conditions.

**Methods** We used a retrospective observational cohort design and the Canadian Vital Statistics Database to identify children aged 19 years or younger who died from a life-threatening condition between January 1, 2008 and December 31, 2014. Multivariable logistic regression was used to determine predictors of in-hospital death for two groups: 1) children aged 1 month to 19 years, and 2) neonates less than 1 month old.

**Results** Of 13,115 decedents less than 19 years of age, 74.2% of children and 98.1% of neonates died in hospital. In children, factors associated with increased odds of in-hospital death included age less than 1 year (OR = 1.73, 95% CI = 1.4 - 2.15), a congenital (OR = 1.74, 95% CI = 1.43 - 2.11) or gastrointestinal cause of death (OR = 5.36, 95% CI = 2.54 - 11.3), and lower income (OR = 1.59, 95% CI = 1.28 - 1.97). Living in British Columbia (OR = 0.43, 95% CI = 0.34 - 0.53) or further from a tertiary pediatric hospital (OR = 0.73, 95% CI = 0.65 - 0.86) were associated with decreased odds of hospital death.

**Interpretation** In addition to demographics, we identified socioeconomic and geographic disparities in location of death suggesting potential inequities in access to high quality care at end-of-life.

## INTRODUCTION

A child's death has a long-lasting and potentially traumatic impact on families, communities, and health professionals providing care.<sup>1,2</sup> Thus, when death in childhood is anticipated – such as when a child is living with a life-threatening condition (e.g., cancer, genetic disorders, neurological conditions)<sup>3</sup> – it is important to provide high quality care to maximize quality of life and facilitate end-of-life care and death in the preferred location.<sup>4</sup> In Canada, provincial studies focused on children highlight the high proportion who die in hospitals.<sup>5-7</sup> Variations in this proportion may reflect variation in child and family preference, but may also be heavily influenced by availability of community services such as pediatric hospice or palliative home care, as well as specialized care through tertiary pediatric hospitals.<sup>4,8,9</sup> Based on research conducted in the United States and other countries, geography and level of income may also impact on where children die.<sup>10-14</sup> From a health equity lens, it is important to identify factors associated with location of death for children with life-threatening condition in Canada.

To date, health administrative data have not been used to study children's location of death across Canada. We therefore examined deaths nationally to identify demographic, socioeconomic, and geographic factors associated with variations in location of death in children who died from life-threatening conditions. Our goal was to identify potential health inequities and opportunities to optimize care across care settings.

## METHODS

### Population and Cohort

This national observational, retrospective cohort study drew on the population of Canadian residents who died at 19 years of age or younger from January 1, 2008 through December 31, 2014. The cohort was created using the Canadian Vital Statistics Database

1  
2  
3 (CVSD), a yearly census of all deaths occurring in Canada with relevant demographic and cause  
4 of death information coded using the International Classification of Diseases, 10<sup>th</sup> edition (ICD-  
5 10).<sup>15</sup> To identify children who died from a life-threatening condition we first excluded those  
6 whose primary cause of death was listed as external, such as accidents, assault, suicide, or  
7 drowning (ICD-10 codes from V01 to Y36), or Sudden Infant Death Syndrome (R95). Next, we  
8 combined classifications developed in the United Kingdom<sup>16</sup> and United States<sup>17</sup> to create a list  
9 of specific ICD-10 codes within 11 categories signifying life-threatening conditions in children  
10 (Supplemental File A). Children included in the final cohort had at least one relevant ICD-10  
11 coded listed either as a primary or contributing cause of death. Based on previous research  
12 showing the vast majority of neonates die in hospital,<sup>4,7</sup> we stratified the cohort to facilitate  
13 separate analysis of children (aged 29 days to 19 years) and neonates (< 29 days of age).  
14  
15  
16  
17  
18  
19  
20  
21  
22  
23  
24  
25  
26  
27

## 28 **Measures**

29  
30  
31 *Outcomes.* The primary outcome was location of death, classified as in-hospital (i.e.,  
32 licensed to operate as hospital under provincial, territorial, or federal government legislation) or  
33 out-of-hospital (e.g., private home, freestanding birthing centre, other facility, other specified  
34 location).<sup>18</sup>  
35  
36  
37  
38  
39

40  
41 *Predictors.* For the child group, age was categorized as: 29 –364 days, 1-4 years, 5-9  
42 years, 10-14 years, and 15-19 years. For the neonate group, age was categorized as < 24 hours  
43 and 24 hours to 28 days. Decedents were assigned into 11 categories of life-threatening  
44 conditions: neurologic, haematologic, oncologic, metabolic, respiratory, circulatory,  
45 gastrointestinal, genitourinary, perinatal, congenital, and other (e.g., systemic lupus).<sup>16,17</sup> For  
46 those with causes of death in multiple categories, assignment was based on the primary cause of  
47 death. In cases with no relevant primary cause and multiple contributing causes (about 5% of the  
48  
49  
50  
51  
52  
53  
54  
55  
56  
57  
58  
59  
60

1  
2  
3 sample) we used an *a priori* determined hierarchy (see Supplemental File B) to prioritize  
4  
5 diagnoses based on the likelihood they were a unifying cause of death (e.g., oncologic diagnoses  
6  
7 were highest priority). Categories were combined as needed to avoid small cell sizes (<6) and  
8  
9 preserve anonymity. Similarly, residential province was collapsed into Atlantic (Newfoundland  
10  
11 and Labrador, Prince Edward Island, Nova Scotia, and New Brunswick), Quebec, Ontario,  
12  
13 Prairies (Manitoba and Saskatchewan), Alberta, British Columbia (BC), and the North  
14  
15 (Northwest Territories, Yukon, and Nunavut). Postal code was used to assign income quintiles  
16  
17 according to residing neighbourhood and rurality with a population <10,000 classified as rural.<sup>19</sup>  
18  
19 Distance from tertiary pediatric hospital was calculated using longitude and latitude data also  
20  
21 derived from the decedent's postal code and the location of the nearest of 16 tertiary pediatric  
22  
23 hospitals in Canada. Distance was categorized into <50 km, 50-199 km, 200-400 km, and >400  
24  
25 km to represent increasingly complex trips (i.e., easy day trip both ways; substantial day trip both  
26  
27 ways; trip likely involving overnight stay; overnight trip possibly involving a plane ride).<sup>20</sup>  
28  
29  
30  
31  
32

### 33 **Statistical Analysis**

34  
35 All analyses were undertaken using SAS (version 9.4). Demographic characteristics and  
36  
37 locations of death among the two groups (children and neonates) were summarized.

38  
39 Multivariable logistic regression was used to model the odds of dying in hospital for each group.

40  
41 Model predictors were selected *a priori* as described above. As full fit was desired, variables  
42  
43 were left in each model regardless of p-value.<sup>21</sup> Missing data was minimal (about 2%); thus,  
44  
45 complete case analysis was used. Model diagnostics, including tests for multicollinearity, were  
46  
47 undertaken prior to selecting the final models for each outcome. All statistical tests were two-  
48  
49 sided; p-values <0.05 were considered significant.  
50  
51  
52

### 53 **RESULTS**

## Patients

Of the 23,360 Canadian children who died over the seven-year study period, 13,115 (56.1%) had a life-threatening condition (5250 children and 7865 neonates) (Figure 1). Among children aged 29 days to 19 years, 74.2% (95% CI = 73.1 - 75.4) died in hospital and 16.1% died at home (95% CI = 15.1 - 17.1). The remainder died at another healthcare facility (2.9%, 95% CI = 2.4 - 3.3) or another location (6.9%, 95% CI = 6.2 - 7.6). In the neonate group, 98.1% (95% CI = 97.9 - 98.5) died in hospital. The most common causes of death in children were congenital conditions (27.7%) followed closely by oncologic conditions (25.6%). Most neonates (67.2%) died within 24 hours of birth and most (61.9%) died from a perinatal condition. Demographics are summarized in Table 1.

## Predictors of Dying in Hospital

Based on multivariable logistic regression, among the child cohort (Table 2), those less than a year of age had higher odds of in-hospital death than those aged 15 - 19 (OR = 1.73, 95% CI = 1.4 - 2.15), while those aged 5 - 9 had lower odds of dying in hospital (OR = 0.66, 95% CI = 0.54 - 0.82). Compared to an oncologic cause of death, all causes of death other than neurologic and metabolic had higher odds of dying in hospital. The increased odds ranged from nearly double for congenital causes (OR = 1.74, 95% CI = 1.43 - 2.11) to more than 5 times for gastrointestinal causes of death (OR = 5.36, 95% CI = 2.54 - 11.3). Compared to Ontario, those residing in BC had lower odds (OR = 0.43, 95% CI = 0.34 - 0.53), while those from Quebec had higher odds (OR = 1.38, 95% CI = 1.14-1.67) of dying in hospital. Compared to the highest income quintile, those in the lowest income quintile had higher odds of dying in hospital (OR = 1.59, 95% CI = 1.28 - 1.97). Finally, those living between 50 and 199 km (OR = 0.73, 95% CI =

1  
2  
3 0.62 - 0.86) or more than 400 km away (OR = 0.73, 95% CI = 0.65 - 0.86) from the tertiary  
4  
5 pediatric hospital had lower odds of dying in hospital than those living <50 km away.  
6

7  
8 Among neonates (Table 3), those less than 24 hours old had 13 times higher odds of  
9  
10 dying in hospital (OR = 13.0, 95% CI = 7.94 - 21.32). Compared to neonates with perinatal  
11  
12 conditions, those with congenital (OR = 0.25, 95% CI = 0.17 - 0.36) or other causes of death  
13  
14 (OR = 0.47, 95% CI = 0.24 - 0.92) had lower odds of dying in hospital. Finally, those residing in  
15  
16 BC had substantially lower odds of dying in hospital (OR = 0.3, 95% CI = 0.19 - 0.49) than those  
17  
18 in Ontario.  
19

## 20 21 **INTERPRETATION**

22  
23  
24 Our study highlights the high proportion of Canadian children who died from a life-  
25  
26 threatening condition in a hospital setting. While not surprising that age and cause of death are  
27  
28 significant predictors of location of death, variability based on province, income, and distance  
29  
30 from a tertiary pediatric hospital that persist after adjustment for other variables indicate  
31  
32 potential inequities in care across the country.  
33

34  
35 The proportion of children who died in hospitals in our study was higher than reported in  
36  
37 other research for children internationally and for adults within Canada. While we found 74.2%  
38  
39 of children 29 days to 19 years died in hospital, national studies in England and New Zealand  
40  
41 with similar populations of children found 65.7% (15420/23484)<sup>22</sup> and 53.6% (265/494)<sup>10</sup>  
42  
43 respectively died in hospital. The proportion of hospital deaths in adult Canadians varies by  
44  
45 study (43% to 60%)<sup>23-26</sup> but is considerably lower than our findings in children.  
46  
47

48  
49 Almost all neonates (98%) died in hospital. Many died within the first 24 hours of life  
50  
51 from a perinatal condition such as birth trauma, infection, or asphyxia leaving little opportunity  
52  
53 to facilitate end of life care outside the hospital. Neonates with congenital conditions (e.g.,  
54  
55  
56  
57  
58  
59  
60

1  
2  
3 chromosomal abnormalities, congenital malformations) were more likely to die at home,  
4 suggesting that antenatal diagnosis and clearer prognosis may facilitate advanced care planning  
5 and out-of-hospital care. Studies have described a link between home death and improved  
6 bereavement outcomes such as reduced depression, anxiety, and complicated grief,<sup>4</sup> highlighting  
7 the importance of improving access to home end-of-life care even for families of neonates.  
8 Increased community support including availability of free-standing hospices may offer  
9 additional options to families of neonates for location of care and death.<sup>27</sup>

10  
11  
12 As described in other research,<sup>10,11,22</sup> children with cancer were more likely to die outside  
13 the hospital, possibly due to the more predictable illness trajectory with more opportunities to  
14 plan and provide supports to facilitate a home death. Other diagnoses (e.g., congenital illnesses),  
15 may have a more unpredictable disease course. Challenges in identifying the terminal phase of  
16 an illness may be associated with less opportunity or desire for a home death.<sup>4,11</sup>

17  
18  
19 While Canada has a publicly funded health care system that is meant to be accessible to  
20 all Canadians regardless of where they live, differences in location of death were noted based on  
21 province, distance from a tertiary pediatric hospital, and neighborhood income quintiles.  
22 Decreased odds of a hospital death in BC (OR = 0.43, 95% CI = 0.34 - 0.53) may reflect  
23 implementation of their comprehensive provincial end-of-life care plan prior to our study  
24 period.<sup>25</sup> BC is also home to Canuck Place Children's Hospice, North America's first  
25 freestanding children's hospice, which opened in 1995 and provides consultation and outreach to  
26 infants, children, and youth and their families throughout the province.<sup>28</sup> Other research has  
27 noted a trend towards an increased number of home deaths in children when there was a more  
28 well-developed system of pediatric palliative care services both in hospitals and within the  
29 community setting.<sup>29,30,31</sup> Both palliative care and other specialty services are concentrated in the  
30  
31  
32  
33  
34  
35  
36  
37  
38  
39  
40  
41  
42  
43  
44  
45  
46  
47  
48  
49  
50  
51  
52  
53  
54  
55  
56  
57  
58  
59  
60



1  
2  
3 16 tertiary pediatric hospitals across Canada. Like others, we found those living further from  
4 these tertiary hospitals were less likely to die in hospital.<sup>6,12</sup> Living very close (e.g., <50km) may  
5 facilitate relatively easy returns to the hospital where care is provided by healthcare professionals  
6 well-known to the family, possibly resulting in reluctance to develop new relationships with  
7 community-based providers. Given the challenges of traveling long distances when a child is  
8 nearing death, it is possible that those living furthest (e.g., >400 km) from a tertiary hospital may  
9 be more likely to remain home if community supports are in place. Further research is needed to  
10 examine distance from hospital as a factor in decision-making about location of death.  
11  
12  
13  
14  
15  
16  
17  
18  
19  
20

21  
22 There are some conflicting findings in previous research about the impact socioeconomic  
23 status on location of death.<sup>10,13</sup> However, consistent with our study, a recent metanalysis found  
24 those living in neighborhoods with the lowest income quintiles were more likely to die in  
25 hospital.<sup>11</sup> Across studies, it is unclear what mechanisms may underlie this disparity. Johnson  
26 and colleagues suggested that patient/family preference, system issues, provider biases or some  
27 combination of those may be at play.<sup>14</sup> Bona and Wolfe further suggested that underserved  
28 populations may have differential access to palliative care supports both in the community and in  
29 the hospital and when support is provided there may be differences in the degree of benefit they  
30 experience from advanced care planning and efforts to improve quality of life.<sup>32</sup> More research is  
31 needed to examine factors underlying socioeconomic status and their contribution to care  
32 inequities.  
33  
34  
35  
36  
37  
38  
39  
40  
41  
42  
43  
44  
45

## 46 **Limitations**

47  
48  
49 Our data do not fully reflect the growth and development of pediatric palliative care in  
50 the last eight years and its potential impact on supports available to children and families in their  
51  
52  
53  
54  
55  
56  
57  
58  
59  
60

1  
2  
3 chosen location of care.<sup>33</sup> However, this study provides an important baseline examination of  
4  
5 location of death that can be used to study changes in the future.  
6

7  
8 Only death record data for decedents was available nationally; more detailed examination  
9  
10 of end-of-life care patterns require healthcare data that is not available nationally due to  
11  
12 differences in reporting by province. The concerns we raise about potential inequities based on  
13  
14 income and geography should be explored in provincial samples to facilitate a more fulsome  
15  
16 description of other factors influencing end-of-life care and location of death. Death records are  
17  
18 also limited in the specificity of location of death outside of hospital. For example, hospices  
19  
20 provide an important alternative to both hospital and home but cannot be examined separately  
21  
22 with current data.<sup>9</sup>  
23  
24  
25

26  
27 In previous work we identified the population of children with life-threatening conditions  
28  
29 where death could have been expected by excluding those who died from an external cause.<sup>33</sup> In  
30  
31 the current study we also used lists of ICD10 codes for life-threatening conditions in children.  
32  
33 This methodology may have resulted in some misclassification given the inability to examine  
34  
35 relevant diagnostic codes in the years preceding death,<sup>34</sup> but nonetheless represents a significant  
36  
37 advancement compared to previous national work.<sup>33</sup>  
38  
39

## 40 **Conclusion**

41  
42 Location of death is commonly used as a marker of quality of end-of-life care.<sup>35-37</sup> While  
43  
44 not all children or their parents prefer to be at home,<sup>4,8</sup> given the link to potentially improved  
45  
46 bereavement outcomes both for parents and siblings,<sup>4</sup> it is important that families of children  
47  
48 with life-threatening conditions are given the opportunity to be at home if they so choose. While  
49  
50 the Canada Health Act<sup>38</sup> includes the principles of universality, comprehensiveness and  
51  
52 accessibility, our study highlighted concerning differences in the likelihood of children's deaths  
53  
54  
55  
56  
57  
58  
59  
60

1  
2  
3 occurring in hospital across measures of income, province of residence, and distance from  
4 tertiary pediatric hospital. These differences may signify a lack of systematic access to both  
5 hospital and in the community-based services including specialized pediatric palliative care  
6 teams, pediatric hospices, and palliative home care. The geographically dispersed population of  
7 Canada means greater efforts are needed to ensure health care principles are applied to all  
8 Canadians and particularly to our most vulnerable children and their families.  
9  
10  
11  
12  
13  
14  
15  
16  
17  
18  
19  
20

### 21 **Acknowledgements**

22  
23 The analysis presented in this paper was conducted at the Toronto RDC which is part of the  
24 Canadian Research Data Centre Network (CRDCN). The services and activities provided by  
25 the Toronto RDC are made possible by the financial or in-kind support of the SSHRC, the CIHR,  
26 the CFI, Statistics Canada, University of Toronto, Ryerson University, and York University. The  
27 views expressed in this paper do not necessarily represent the CRDCN's or that of its partners'.  
28  
29  
30  
31

32 KW and SB had full access to all data in the study and take responsibility for the integrity of the  
33 data and the accuracy of the data analysis. KW, SB, and SG drafted the manuscript, while  
34 remaining authors provided critical revisions. All authors contributed to the study conception and  
35 design, were involved in data interpretation, and gave final approval of the manuscript.  
36  
37  
38  
39  
40  
41  
42  
43  
44  
45  
46  
47  
48  
49  
50  
51  
52  
53  
54  
55  
56  
57  
58  
59  
60

## References

1. Rosenberg AR, Postier A, Osenga K, Kricbergs U, Neville B, Dussel V, Wolfe J. Long-term psychosocial outcomes among bereaved siblings of children with cancer. *J Pain Symptom Manage*. 2015;49(1):55-65.
2. Patterson JM, Holm KE, Gurney JG. The impact of childhood cancer on the family: A qualitative analysis of strains, resources, and coping behaviors. *Psycho Oncol*. 2004;13(6):390-407.
3. Spicer S, Macdonald ME, Davies D, Vadeboncoeur C, Siden H. Introducing a lexicon of terms for paediatric palliative care. *Paediatr Child Health*. 2015;20(3):155-156.
4. Johnston EE, Martinez I, Currie E, Brock KE, Wolfe J. Hospital or home? Where should children die and how do we make that a reality? *J Pain Symptom Manage*. 2020;60(1):106-115.
5. Chavoshi N, Miller T, Siden H. Resource utilization among individuals dying of pediatric life-threatening diseases. *J Palliat Med*. 2013;16(10):1210-4.
6. Kassam A, Sutradhar R, Widger K, Rapoport A, Pole JD, Nelson K, Wolfe J, Earle CC, Gupta S. Predictors of and trends in high-intensity end-of-life care among children with cancer: a population-based study using health services data. *J Clin Oncol*. 2017;35(2):236-42.
7. Widger K, Seow H, Rapoport A, Chalifoux M, Tanuseputro P. Children's end-of-life health care use and cost. *Pediatrics*. 2017;139(4):e20162956.
8. Bluebond-Langner M, Beecham E, Candy B, Langner R, Jones L. Preferred place of death for children and young people with life-limiting and life-threatening conditions: A systematic review of the literature and recommendations for future inquiry and policy. *Palliat Med*. 2013;27(8):705-13.
9. Siden H, Miller M, Straatman L, Omesi L, Tucker T, Collins JJ. A report on location of death in paediatric palliative care between home, hospice and hospital. *Palliat Med*. 2008;22(7):831-4.
10. Chang E, MacLeod R, Drake R. Characteristics influencing location of death for children with life-limiting illness. *Arch Dis Childh*. 2013;98(6):419-24.
11. Wolff SL, Christiansen CF, Nielsen MK, Johnsen SP, Schroeder H, Neergaard MA. Predictors for place of death among children: A systematic review and meta-analyses of recent literature. *Eur J Pediatr*. 2020;179:1227-1238.

12. Johnston EE, Alvarez E, Saynina O, Sanders L, Bhatia S, Chamberlain LJ. Disparities in the intensity of end-of-life care for children with cancer. *Pediatrics*. 2017;140(4):e20170671.
13. Cardenas-Turanzas M, Toval in-Ahumada H, Carrillo MT, Paez-Aguirre S, Elting L. The place of death of children with cancer in the metropolitan areas of Mexico. *J Palliat Med*. 2008;11:973–979.
14. Johnston EE, Bogetz J, Saynina O, Chamberlain LJ, Bhatia S, Sanders L. Disparities in inpatient intensity of end-of-life care for complex chronic conditions. *Pediatrics*. 2019;143(5):e20182228.
15. World Health Organization (WHO). International statistical classification of diseases and related health problems. 10<sup>th</sup> revision. Geneva: WHO; 2010.
16. Fraser LK, Miller M, Aldridge J, McKinney PA, Parslow RC, Hain R. Life-limiting and life-threatening conditions in children and young people in the United Kingdom; National and regional prevalence in relation to socioeconomic status and ethnicity. Final report for Children’s Hospice, UK. 2011.
17. Feudtner C, Feinstein JA, Zhong W, Hall M, Dai D. Pediatric complex chronic conditions classification system version 2: updated for ICD-10 and complex medical technology dependence and transplantation. *BMC Pediatrics*. 2014;14(1):199.
18. Statistics Canada. Canadian Vital Statistics Death Database: Data Dictionary and User Guide. Ottawa: Author; 2013.
19. Plessis V, Beshiri R, Bollman RD, Clemenson H. Definitions of “Rural”. [21-601-MIE]. Ottawa: Statistics Canada; 2002.
20. Stephenson A, Hux J, Tullis E, Austin PC, Corey M, Ray J. Socioeconomic status and risk of hospitalization among individuals with cystic fibrosis in Ontario, Canada. *Pediatr Pulmonol*. 2011;46(4):376-84.
21. Steyerberg EW, Harrell Jr FE, Borsboom GJ, Eijkemans MJ, Vergouwe Y, Habbema JD. Internal validation of predictive models: Efficiency of some procedures for logistic regression analysis. *J Clin Epidemiol*. 2001;54(8):774-81.
22. Gibson-Smith D, Jarvis S, Fraser L. Place of death of children and young adults with a life-limiting condition in England: A retrospective cohort study. *Arch Dis Childh*. 2021;106:780–785.
23. Canadian Partnership Against Cancer. Palliative and end-of-life care [Internet]. Toronto: Canadian Partnership Against Cancer; 2017. Available: <https://www.partnershipagainstcancer.ca/topics/palliative-and-end-of-life-care/> (accessed 2022 March 9)

- 1
  - 2
  - 3
  - 4
  - 5
  - 6
  - 7
  - 8
  - 9
  - 10
  - 11
  - 12
  - 13
  - 14
  - 15
  - 16
  - 17
  - 18
  - 19
  - 20
  - 21
  - 22
  - 23
  - 24
  - 25
  - 26
  - 27
  - 28
  - 29
  - 30
  - 31
  - 32
  - 33
  - 34
  - 35
  - 36
  - 37
  - 38
  - 39
  - 40
  - 41
  - 42
  - 43
  - 44
  - 45
  - 46
  - 47
  - 48
  - 49
  - 50
  - 51
  - 52
  - 53
  - 54
  - 55
  - 56
  - 57
  - 58
  - 59
  - 60
24. Hill AD, Stukel TA, Fu L, Scales DC, Laupacis A, Rubinfeld GD, Wunsch H, Downar J, Rockwood K, Heyland DK, Sinha SK. Trends in site of death and health care utilization at the end of life: a population-based cohort study. *CMAJ Open*. 2019;7(2):E306.
25. Wilson DM, Shen Y, Birch S. New evidence on end-of-life hospital utilization for enhanced health policy and services planning. *J Palliat Med*. 2017;20(7):752-8.
26. Canadian Institute for Health Information. Your Health System: Hospital Deaths (HSMR); 2019. Available: <https://yourhealthsystem.cihi.ca/hsp/inbrief?lang=en#!/indicators/005/hospital-deaths-hsmr;/mapC1;mapLevel2;/> (accessed 2022 March 9).
27. Craig F, Mancini A. Can we truly offer a choice of place of death in neonatal palliative care? *Semin Fetal Neonatal Med*. 2013;18(2):93-98.
28. Canuck Place Children's Hospice [Internet]. Vancouver: Canuck Place; [Date unknown]. Available from: <https://www.canuckplace.org/>. (accessed 2022 March 9).
29. Schmidt P, Otto M, Hechler T, Metzging S, Wolfe J, Zernikow B. Did increased availability of pediatric palliative care lead to improved palliative care outcomes in children with cancer? *J Palliat Med* 2013;16(9):1034-9.
30. Håkanson C, Öhlén J, Kreicbergs U, Cardenas-Turanzas M, Wilson D, Louka M, Frache S, Giovannetti L, Naylor W, Rhee Y, Ramos MR, Teno J, Beernaert K, Deliens L, Houttekier D, Cohen J. Place of death of children with complex chronic conditions: Cross-national study of 11 countries. *Eur J Pediatr*. 2017;176(3):327-335.
31. Lysecki DL, Gupta S, Rapoport A, Rhodes E, Spruin S, Vadeboncoeur C, Widger K, Tanuseputro P. Children's health care utilization and cost in the last year of life: A cohort comparison with and without regional specialist pediatric palliative care. *J Palliat Med*. 2022; online ahead of print 10.1089/jpm.2021.0175.
32. Bona K, Wolfe J. Disparities in pediatric palliative care: An opportunity to strive for equity. *Pediatrics*. 2017;140(4):e20171662.
33. Widger K, Davies D, Rapoport A, Vadeboncoeur C, Liben S, Sarpal A, Stenekes S, Cyr C, Daoust L, Grégoire MC, Robertson M. Pediatric palliative care in Canada in 2012: A cross-sectional descriptive study. *CMAJ Open*. 2016;4(4):E562.
34. Brameld K, Spilsbury K, Rosenwax L, Murray K, Semmens J. How different administrative databases change the size of a potential palliative care population. *Int J Pop Data Science*. 2017;1(1).
35. Widger K, Medeiros C, Trenholm M, Zuniga-Villanueva G, Streuli JC. Indicators used to assess the impact of specialized pediatric palliative care: A scoping review. *J Palliat Med*. 2019;22(2),199-219.

- 1  
2  
3  
4 36. Marcus KL, Santos G, Ciapponi A, Comande D, Bilodeau M, Wolfe J, Dussel V. Impact of  
5 specialized pediatric palliative care: A systematic review. *J Pain Symptom Manage.*  
6 2020;59:339–364.e10.  
7  
8  
9 37. Taylor J, Booth A, Beresford B, Phillips B, Wright K, Fraser L. Specialist paediatric  
10 palliative care for children and young people with cancer: A mixed-methods systematic  
11 review. *Palliat Med.* 2020;34(6):731-775.  
12  
13 38. Canada Health Act, R.S.C., 1985, c.6, s.1 [Internet]. 2017 December 12. Available from:  
14 <https://laws-lois.justice.gc.ca/eng/acts/c-6/page-1.html> (accessed 2022 March 9).  
15  
16  
17  
18  
19  
20  
21  
22  
23  
24  
25  
26  
27  
28  
29  
30  
31  
32  
33  
34  
35  
36  
37  
38  
39  
40  
41  
42  
43  
44  
45  
46  
47  
48  
49  
50  
51  
52  
53  
54  
55  
56  
57  
58  
59  
60

Confidential

1  
2  
3  
4  
5  
6  
7  
8  
9  
10  
11  
12  
13  
14  
15  
16  
17  
18  
19  
20  
21  
22  
23  
24  
25  
26  
27  
28  
29  
30  
31  
32  
33  
34  
35  
36  
37  
38  
39  
40  
41  
42  
43  
44  
45  
46  
47  
48  
49  
50  
51  
52  
53  
54  
55  
56  
57  
58  
59  
60

**Figure 1. Total number of cases identified and reasons for exclusion**

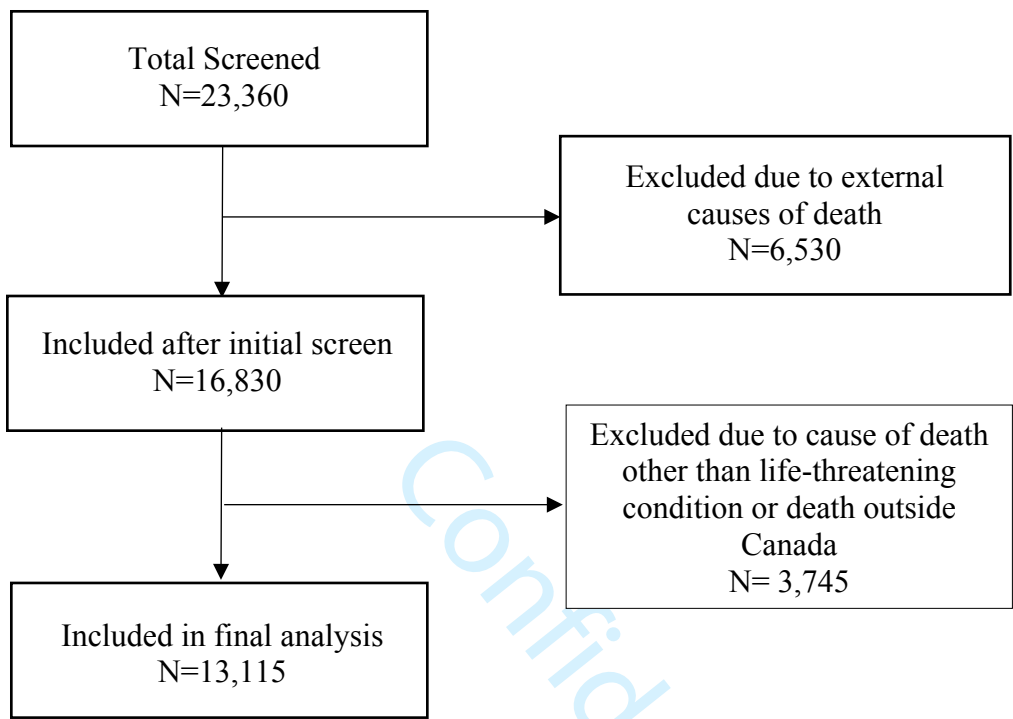

Confidential



**Table 1. Characteristics of study cohort (n=13115).** Numbers may not add to total cohort size due to missing data. \*Categories combined to avoid small cell sizes.

| <b>Characteristic</b>  | <b>No. (%) Older Children<br/>29 days-19 years<br/>(n=5250)</b> | <b>No. (%) Neonates<br/>&lt;29 days<br/>(n=7865)</b> |
|------------------------|-----------------------------------------------------------------|------------------------------------------------------|
| <b>Age</b>             |                                                                 |                                                      |
| <24 hours              | ---                                                             | 5285 (67.2)                                          |
| 24 hours - 28 days     | ---                                                             | 2580 (32.8)                                          |
| 29 - 364 days          | 1700 (32.4)                                                     | ---                                                  |
| 1 - 4 years            | 980 (18.7)                                                      | ---                                                  |
| 5 - 9 years            | 665 (12.7)                                                      | ---                                                  |
| 10 - 14 years          | 745 (14.2)                                                      | ---                                                  |
| 15 - 19 years          | 1150 (22.0)                                                     | ---                                                  |
| <b>Sex</b>             |                                                                 |                                                      |
| Female                 | 2810 (46.5)                                                     | 3595 (45.7)                                          |
| Male                   | 2440 (53.5)                                                     | 4270 (54.3)                                          |
| <b>Cause of Death</b>  |                                                                 |                                                      |
| Perinatal              | 305 (5.8)                                                       | 4865 (61.9)                                          |
| Congenital             | 1455 (27.7)                                                     | 2690 (34.2)                                          |
| Oncology               | 1345 (25.6)                                                     | 60 (0.8)*                                            |
| Haematology            | 120 (2.3)                                                       |                                                      |
| Neurology              | 980 (18.7)                                                      | 45 (0.6)                                             |
| Metabolic              | 345 (6.6)                                                       | 65 (0.8)                                             |
| Circulatory            | 330 (6.3)                                                       | 40 (0.5)                                             |
| Respiratory            | 195 (3.7)                                                       |                                                      |
| Gastrointestinal       | 95 (1.8)                                                        | 100 (1.3)*                                           |
| Genitourinary          | 55 (1.1)                                                        |                                                      |
| Other                  | 30 (0.6)                                                        |                                                      |
| <b>Province/Region</b> |                                                                 |                                                      |
| Ontario                | 2055 (39.1)                                                     | 3240 (41.2)                                          |
| Quebec                 | 1095 (20.9)                                                     | 2035 (25.9)                                          |
| Alberta                | 675 (12.9)                                                      | 1015 (12.9)                                          |
| Prairies               | 520 (9.9)                                                       | 600 (7.6)                                            |
| British Columbia       | 540 (10.3)                                                      | 570 (7.3)                                            |
| Atlantic               | 320 (6.1)                                                       | 350 (4.5)                                            |
| North                  | 45 (0.9)                                                        | 55 (1.5)                                             |
| <b>Income Quintile</b> |                                                                 |                                                      |
| 1 (lowest)             | 1210 (23.4)                                                     | 2055 (26.7)                                          |
| 2                      | 1025 (19.8)                                                     | 1530 (19.9)                                          |
| 3                      | 1000 (19.3)                                                     | 1490 (19.3)                                          |
| 4                      | 1050 (20.3)                                                     | 1520 (19.7)                                          |
| 5 (highest)            | 890 (17.2)                                                      | 1110 (14.1)                                          |
| <b>Rurality</b>        |                                                                 |                                                      |
| Urban                  | 4085 (78.3)                                                     | 6330 (81.7)                                          |
| Rural                  | 1135 (21.7)                                                     | 1420 (18.3)                                          |

|                                         |             |             |
|-----------------------------------------|-------------|-------------|
| <b>Distance from Pediatric Hospital</b> |             |             |
| <50 km                                  | 2855 (54.8) | 4700 (60.7) |
| 50 - 199 km                             | 1460 (28.0) | 1910 (24.7) |
| 200 - 400 km                            | 575 (11.0)  | 645 (8.3)   |
| >400 km                                 | 325 (6.2)   | 485 (6.3)   |
| <b>Location of Death</b>                |             |             |
| Hospital                                | 3895 (74.2) | 7715 (98.1) |
| Home                                    | 845 (16.1)  | 60 (0.8)    |
| Other healthcare facility               | 150 (2.9)   | 30 (0.4)    |
| Other location                          | 360 (6.9)   | 60 (0.8)    |

Confidential

**Table 2. Multivariable logistic regression examining factors associated with death in hospital among children (29 days – 19 years) (n=5250)**

| Characteristic                          | Odds Ratio | 95% confidence limits |       | P value |
|-----------------------------------------|------------|-----------------------|-------|---------|
| <b>Age</b>                              |            |                       |       |         |
| 15 - 19 years                           | 1.0        |                       |       |         |
| 10 - 14 years                           | 0.95       | 0.77                  | 1.17  | 0.646   |
| 5 - 9 years                             | 0.66       | 0.54                  | 0.82  | 0.0001  |
| 1 - 4 years                             | 0.88       | 0.72                  | 1.07  | 0.198   |
| 29 - 364 days                           | 1.73       | 1.40                  | 2.15  | <0.001  |
| <b>Sex</b>                              |            |                       |       |         |
| Male                                    | 1.0        |                       |       |         |
| Female                                  | 1.06       | 0.93                  | 1.21  | 0.408   |
| <b>Cause of Death</b>                   |            |                       |       |         |
| Oncology                                | 1.0        |                       |       |         |
| Congenital                              | 1.74       | 1.43                  | 2.11  | <0.001  |
| Neurology                               | 1.07       | 0.90                  | 1.28  | 0.484   |
| Metabolic                               | 1.12       | 0.86                  | 1.46  | 0.414   |
| Circulatory                             | 2.73       | 1.96                  | 3.79  | <0.001  |
| Perinatal                               | 2.78       | 1.84                  | 4.21  | <0.001  |
| Respiratory                             | 3.37       | 2.15                  | 5.31  | <0.001  |
| Haematology                             | 2.52       | 1.49                  | 4.26  | 0.001   |
| Gastrointestinal                        | 5.36       | 2.54                  | 11.30 | <0.001  |
| Genitourinary                           | 3.44       | 1.43                  | 8.26  | 0.006   |
| Other                                   | 3.34       | 1.15                  | 9.68  | 0.027   |
| <b>Region of Residence</b>              |            |                       |       |         |
| Ontario                                 | 1.0        |                       |       |         |
| Quebec                                  | 1.38       | 1.14                  | 1.67  | 0.001   |
| Alberta                                 | 1.03       | 0.83                  | 1.27  | 0.821   |
| Prairies                                | 1.27       | 0.98                  | 1.63  | 0.070   |
| British Columbia                        | 0.43       | 0.34                  | 0.53  | <0.001  |
| Atlantic                                | 1.02       | 0.76                  | 1.37  | 0.878   |
| North                                   | 0.49       | 0.23                  | 1.05  | 0.067   |
| <b>Income Quintile</b>                  |            |                       |       |         |
| 5 (highest)                             | 1.0        |                       |       |         |
| 4                                       | 1.08       | 0.88                  | 1.33  | 0.475   |
| 3                                       | 1.07       | 0.87                  | 1.32  | 0.533   |
| 2                                       | 1.23       | 0.99                  | 1.52  | 0.057   |
| 1 (lowest)                              | 1.59       | 1.28                  | 1.97  | <0.001  |
| <b>Rurality</b>                         |            |                       |       |         |
| Urban                                   | 1.0        |                       |       |         |
| Rural                                   | 0.98       | 0.81                  | 1.18  | 0.806   |
| <b>Distance from Pediatric Hospital</b> |            |                       |       |         |
| < 50 km                                 | 1.0        |                       |       |         |
| 50 - 199 km                             | 0.73       | 0.62                  | 0.86  | <0.001  |
| 200 - 399 km                            | 0.87       | 0.68                  | 1.11  | 0.269   |

1  
2  
3  
4  
5  
6  
7  
8  
9  
10  
11  
12  
13  
14  
15  
16  
17  
18  
19  
20  
21  
22  
23  
24  
25  
26  
27  
28  
29  
30  
31  
32  
33  
34  
35  
36  
37  
38  
39  
40  
41  
42  
43  
44  
45  
46  
47  
48  
49  
50  
51  
52  
53  
54  
55  
56  
57  
58  
59  
60

|          |      |      |      |        |
|----------|------|------|------|--------|
| > 400 km | 0.73 | 0.65 | 0.86 | <0.001 |
|----------|------|------|------|--------|

Confidential

**Table 3. Multivariable logistic regression examining factors associated with death in hospital among neonates (<29days) (n=7865)**

| Characteristic                          | Odds Ratio | 95% confidence limits |       | P value |
|-----------------------------------------|------------|-----------------------|-------|---------|
| <b>Age</b>                              |            |                       |       |         |
| <24 hours                               | 13.01      | 7.94                  | 21.32 | <.0001  |
| 24 hours - 28 days                      | 1.0        |                       |       |         |
| <b>Sex</b>                              |            |                       |       |         |
| Male                                    | 1.0        |                       |       |         |
| Female                                  | 0.75       | 0.53                  | 1.05  | 0.097   |
| <b>Cause of Death</b>                   |            |                       |       |         |
| Perinatal                               | 1.0        |                       |       |         |
| Congenital                              | 0.25       | 0.17                  | 0.36  | <.0001  |
| All other causes                        | 0.47       | 0.24                  | 0.92  | 0.027   |
| <b>Region of Residence</b>              |            |                       |       |         |
| Ontario                                 | 1.0        |                       |       |         |
| Quebec                                  | 1.36       | 0.79                  | 2.34  | 0.262   |
| Alberta                                 | 0.53       | 0.31                  | 0.88  | 0.015   |
| Prairies                                | 0.97       | 0.49                  | 1.92  | 0.926   |
| British Columbia                        | 0.30       | 0.19                  | 0.49  | <.0001  |
| Atlantic                                | 1.54       | 0.53                  | 4.45  | 0.426   |
| North                                   | 0.27       | 0.05                  | 1.42  | 0.121   |
| <b>Income Quintile</b>                  |            |                       |       |         |
| 5 (highest)                             | 1.0        |                       |       |         |
| 4                                       | 1.24       | 0.70                  | 2.18  | 0.464   |
| 3                                       | 1.33       | 0.75                  | 2.35  | 0.331   |
| 2                                       | 1.57       | 0.88                  | 2.83  | 0.13    |
| 1 (lowest)                              | 1.16       | 0.69                  | 1.94  | 0.58    |
| <b>Rurality</b>                         |            |                       |       |         |
| Urban                                   | 1.0        |                       |       |         |
| Rural                                   | 0.73       | 0.45                  | 1.19  | 0.206   |
| <b>Distance from Pediatric Hospital</b> |            |                       |       |         |
| < 50 km                                 | 1.0        |                       |       |         |
| 50 - 199 km                             | 0.66       | 0.43                  | 1.01  | 0.056   |
| 200 - 399 km                            | 1.08       | 0.56                  | 2.12  | 0.814   |
| > 400 km                                | 0.89       | 0.41                  | 1.94  | 0.771   |

STROBE Statement—Checklist of items that should be included in reports of *cohort studies*

|                              | Item No | Recommendation                                                                                                                                                                                                                                                                                                         | Page No |
|------------------------------|---------|------------------------------------------------------------------------------------------------------------------------------------------------------------------------------------------------------------------------------------------------------------------------------------------------------------------------|---------|
| <b>Title and abstract</b>    | 1       | (a) Indicate the study's design with a commonly used term in the title or the abstract<br>(b) Provide in the abstract an informative and balanced summary of what was done and what was found                                                                                                                          | 1-2     |
| <b>Introduction</b>          |         |                                                                                                                                                                                                                                                                                                                        |         |
| Background/rationale         | 2       | Explain the scientific background and rationale for the investigation being reported                                                                                                                                                                                                                                   | 3       |
| Objectives                   | 3       | State specific objectives, including any prespecified hypotheses                                                                                                                                                                                                                                                       | 3       |
| <b>Methods</b>               |         |                                                                                                                                                                                                                                                                                                                        |         |
| Study design                 | 4       | Present key elements of study design early in the paper                                                                                                                                                                                                                                                                | 3-4     |
| Setting                      | 5       | Describe the setting, locations, and relevant dates, including periods of recruitment, exposure, follow-up, and data collection                                                                                                                                                                                        | 3-4     |
| Participants                 | 6       | (a) Give the eligibility criteria, and the sources and methods of selection of participants. Describe methods of follow-up<br>(b) For matched studies, give matching criteria and number of exposed and unexposed                                                                                                      | 3-4     |
| Variables                    | 7       | Clearly define all outcomes, exposures, predictors, potential confounders, and effect modifiers. Give diagnostic criteria, if applicable                                                                                                                                                                               | 4-5     |
| Data sources/<br>measurement | 8*      | For each variable of interest, give sources of data and details of methods of assessment (measurement). Describe comparability of assessment methods if there is more than one group                                                                                                                                   | 4-5     |
| Bias                         | 9       | Describe any efforts to address potential sources of bias                                                                                                                                                                                                                                                              | 4       |
| Study size                   | 10      | Explain how the study size was arrived at                                                                                                                                                                                                                                                                              | N/A     |
| Quantitative variables       | 11      | Explain how quantitative variables were handled in the analyses. If applicable, describe which groupings were chosen and why                                                                                                                                                                                           | 4-5     |
| Statistical methods          | 12      | (a) Describe all statistical methods, including those used to control for confounding<br>(b) Describe any methods used to examine subgroups and interactions<br>(c) Explain how missing data were addressed<br>(d) If applicable, explain how loss to follow-up was addressed<br>(e) Describe any sensitivity analyses | 5       |
| <b>Results</b>               |         |                                                                                                                                                                                                                                                                                                                        |         |
| Participants                 | 13*     | (a) Report numbers of individuals at each stage of study—eg numbers potentially eligible, examined for eligibility, confirmed eligible, included in the study, completing follow-up, and analysed<br>(b) Give reasons for non-participation at each stage<br>(c) Consider use of a flow diagram                        | 6       |
| Descriptive data             | 14*     | (a) Give characteristics of study participants (eg demographic, clinical, social) and information on exposures and potential confounders<br>(b) Indicate number of participants with missing data for each variable of interest<br>(c) Summarise follow-up time (eg, average and total amount)                         | 6       |
| Outcome data                 | 15*     | Report numbers of outcome events or summary measures over time                                                                                                                                                                                                                                                         | 6-7     |

|    |                          |    |                                                                                                                                                                                                              |       |
|----|--------------------------|----|--------------------------------------------------------------------------------------------------------------------------------------------------------------------------------------------------------------|-------|
| 1  | Main results             | 16 | (a) Give unadjusted estimates and, if applicable, confounder-adjusted estimates and their precision (eg, 95% confidence interval). Make clear which confounders were adjusted for and why they were included | 6-7   |
| 2  |                          |    | (b) Report category boundaries when continuous variables were categorized                                                                                                                                    |       |
| 3  |                          |    | (c) If relevant, consider translating estimates of relative risk into absolute risk for a meaningful time period                                                                                             |       |
| 4  |                          |    |                                                                                                                                                                                                              |       |
| 5  |                          |    |                                                                                                                                                                                                              |       |
| 6  |                          |    |                                                                                                                                                                                                              |       |
| 7  |                          |    |                                                                                                                                                                                                              |       |
| 8  |                          |    |                                                                                                                                                                                                              |       |
| 9  | Other analyses           | 17 | Report other analyses done—eg analyses of subgroups and interactions, and sensitivity analyses                                                                                                               | 6-7   |
| 10 |                          |    |                                                                                                                                                                                                              |       |
| 11 | <b>Discussion</b>        |    |                                                                                                                                                                                                              |       |
| 12 |                          |    |                                                                                                                                                                                                              |       |
| 13 | Key results              | 18 | Summarise key results with reference to study objectives                                                                                                                                                     | 7-9   |
| 14 | Limitations              | 19 | Discuss limitations of the study, taking into account sources of potential bias or imprecision. Discuss both direction and magnitude of any potential bias                                                   | 10    |
| 15 |                          |    |                                                                                                                                                                                                              |       |
| 16 | Interpretation           | 20 | Give a cautious overall interpretation of results considering objectives, limitations, multiplicity of analyses, results from similar studies, and other relevant evidence                                   | 10-11 |
| 17 |                          |    |                                                                                                                                                                                                              |       |
| 18 |                          |    |                                                                                                                                                                                                              |       |
| 19 | Generalisability         | 21 | Discuss the generalisability (external validity) of the study results                                                                                                                                        | 10-11 |
| 20 |                          |    |                                                                                                                                                                                                              |       |
| 21 | <b>Other information</b> |    |                                                                                                                                                                                                              |       |
| 22 | Funding                  | 22 | Give the source of funding and the role of the funders for the present study and, if applicable, for the original study on which the present article is based                                                | 1     |
| 23 |                          |    |                                                                                                                                                                                                              |       |
| 24 |                          |    |                                                                                                                                                                                                              |       |

\*Give information separately for exposed and unexposed groups.

**Note:** An Explanation and Elaboration article discusses each checklist item and gives methodological background and published examples of transparent reporting. The STROBE checklist is best used in conjunction with this article (freely available on the Web sites of PLoS Medicine at <http://www.plosmedicine.org/>, Annals of Internal Medicine at <http://www.annals.org/>, and Epidemiology at <http://www.epidem.com/>). Information on the STROBE Initiative is available at <http://www.strobe-statement.org>.

**Supplemental File A – ICD-10 Codes Signifying a Life-Threatening Condition.**<sup>16,17</sup> GI = Gastrointestinal; GU = Genitourinary

| Neurology     |            | Hematology | Oncology | Metabolic | Respiratory | Circulatory | GI    | GU    | Perinatal | Congenital |       | Other |
|---------------|------------|------------|----------|-----------|-------------|-------------|-------|-------|-----------|------------|-------|-------|
| A17           | G60.0      | B20-B24    | C00-C97  | E31.0     | E84         | I21         | K55.0 | N17   | P10.1     | Q00-Q07    | Q64.2 | H11.1 |
| A81.0         | G60.1      | D56.1      | D33      | E34.8     | G47.35      | I27.0       | K55.9 | N17   | P11.2     | Q20.0      | Q74.3 | H49.8 |
| A81.1         | G70.2      | D61.0      | D43      | E70.2     | J84.1       | I27.82      | K72   | N18   | P21.0     | Q20.3      | Q75.0 | H35.5 |
| F71-F73       | G70.9      | D61.9      | D44.4    | E71       | J96         | I42         | K74   | N19   | P28.5     | Q20.4      | Q77.2 | M31.3 |
| F84.2         | G71.0      | D70        | D48      | E72       | J98.4       | I43         | K76.5 | N25.8 | P29.0     | Q20.6      | Q77.3 | M32.1 |
| G10           | G71.1      | D76.1      |          | E74       |             | I61.3       | K86.8 |       | P29.3     | Q20.8      | Q77.4 | M89.5 |
| G11.1-G11.4   | G71.2      | D81        |          | E75       |             | I63.30      |       |       | P35.0     | Q21.3      | Q78.0 | T86.0 |
| G11.8         | G71.3      | D82.1      |          | E76       |             | I63.50      |       |       | P35.1     | Q23.2      | Q78.5 | T86.2 |
| G11.9         | G72        | D83        |          | E77       |             | I81         |       |       | P35.8     | Q21.8      | Q79.2 | Z51.5 |
| G12           | G80.0      | D89.1      |          | E79.1     |             |             |       |       | P37.1     | Q22.0      | Q79.3 |       |
| G20           | G80.8      |            |          | E83.0     |             |             |       |       | P52.4     | Q22.1      | Q80.4 |       |
| G21.0         | G81.90     |            |          | E88.0     |             |             |       |       | P52.5     | Q22.4      | Q81   |       |
| G21.1         | G82.3      |            |          | E88.1     |             |             |       |       | P52.9     | Q22.5      | Q82.1 |       |
| G21.8         | G82.4      |            |          |           |             |             |       |       | P83.2     | Q22.6      | Q82.4 |       |
| G23.0-G23.2   | G82.5      |            |          |           |             |             |       |       | P91.2     | Q23.0      | Q85.1 |       |
| G23.8         | G82.90     |            |          |           |             |             |       |       | P91.6     | Q23.4      | Q85.8 |       |
| G24.02        | G83.5      |            |          |           |             |             |       |       | P96.0     | Q23.9      | Q86.0 |       |
| G24.8         | G83.9      |            |          |           |             |             |       |       |           | Q25.4      | Q87.0 |       |
| G25.3-G25.5   | G90.1      |            |          |           |             |             |       |       |           | Q25.6      | Q87.1 |       |
| G25.81-G25.83 | G90.9      |            |          |           |             |             |       |       |           | Q26.2      | Q87.2 |       |
| G25.89        | G91.1      |            |          |           |             |             |       |       |           | Q26.4      | Q87.8 |       |
| G25.9         | G93.1      |            |          |           |             |             |       |       |           | Q26.8      | Q91   |       |
| G31.01        | G93.4-93.9 |            |          |           |             |             |       |       |           | Q28.2      | Q92.0 |       |
| G31.09        | G94        |            |          |           |             |             |       |       |           | Q30-Q34    | Q92.1 |       |
| G31.8         | G95.19     |            |          |           |             |             |       |       |           | Q39.6      | Q92.4 |       |
| G31.9         | G95.89     |            |          |           |             |             |       |       |           | Q41.0      | Q92.7 |       |
| G32.89        |            |            |          |           |             |             |       |       |           | Q41.9      | Q92.8 |       |
| G35           |            |            |          |           |             |             |       |       |           | Q43.7      | Q93.2 |       |
| G37.1         |            |            |          |           |             |             |       |       |           | Q44.2      | Q93.3 |       |
| G37.2         |            |            |          |           |             |             |       |       |           | Q44.7      | Q93.4 |       |
| G37.8         |            |            |          |           |             |             |       |       |           | Q60.1      | Q93.5 |       |
| G40.1-40.5    |            |            |          |           |             |             |       |       |           | Q60.6      | Q93.8 |       |
| G40.8         |            |            |          |           |             |             |       |       |           | Q61.4      | Q95.2 |       |
| G40.9         |            |            |          |           |             |             |       |       |           | Q61.9      |       |       |



## Supplemental File B – Prioritization of diagnostic categories

In less than 5% of the cohort there was no relevant underlying cause and multiple contributing causes in different categories. Therefore, we developed a hierarchy of categories based on the likelihood that the category was a unifying cause of death. The hierarchy was as follows:

- 1) oncology
- 2) metabolic
- 3) congenital
- 4) circulatory
- 5) neurological
- 6) respiratory
- 7) haematology
- 8) gastrointestinal
- 9) genitourinary
- 10) other
- 11) perinatal

Patients were assigned to a category based on having a contributing cause falling into the highest category in the list. Thus, a child with contributing causes of death in both the oncology and circulatory category was assigned to oncology as the cause of death.
